# Supplementary material for: Nazarbayev University School of Medicine Master of Public Health Program
Source: Research Square preprint supplement (doi:10.21203/rs.3.rs-7506110/v1), 2025-10-23
Supplement: Supplementary file 1 [file 02c989974457e6e8e628fb86.pdf]

# Response to Technical Check

Manuscript Title: Nazarbayev University School of Medicine Master of Public Health Program

Manuscript ID: ebc2dc7b-d2ec-446b-b201-9a6175ea343a v1.0

Dear Editorial Team,

Thank you for your feedback. Please find below the list of revisions made to address the requested points:

1. Ethics declaration

We have added the following statement: "The study was conducted in accordance with the Declaration of Helsinki."

2. First page

We have updated the first page of the manuscript to include:

- The full names of all authors.
- Complete affiliations and addresses of all authors, including city and country.
- The email address of the corresponding author.
- A clear indication of the corresponding author: "Corresponding author: Nabi Arystan (email: nabi.arystan@nu.edu.kz)."

3. Declarations section

We have completed the Declarations section with the required subsections:

- Ethics approval and consent to participate
- Consent for publication
- Availability of data and materials
- Competing interests
- Funding
- Authors' contributions
- Acknowledgements
- Authors' information (optional)

We confirm that no further changes were made to the manuscript beyond these requested amendments.

Best regards,  
Nabi Arystan
