# Supplementary material for: Nazarbayev University School of Medicine Master of Public Health Program
Source: Research Square preprint supplement (doi:10.21203/rs.3.rs-7506110/v1), 2025-10-23
Supplement: Supplementary file 1 [file 822a9e25350b6df5662f7eb6.docx]

Appendix 1

**TOPIC GUIDE Semi Structed Interviews**

Introduction:

• Thank participant for taking part and inform them that you are recording the interview

• Introduce yourself, title of the project,

• Briefly outline aim of the interview: interview is to gain a deeper understanding of medical students’ pandemic experiences.

• Consent form: read out and ask participant to express consent verbally. Ask if they have any questions at this point.

**• Explain that the interview will cover four broad topics: 1) The impact of Covid-19 on wellbeing; 2) The impact of Covid-19 on education;  3) Coping Mechanism During COVID-19; and 4) The impact of Covid-19 on professional identity formation.**

• Explain that the interview will last approximately one hour; participant will be asked if they wish to continue when the hour is up.

**TOPIC GUIDE** – questions will address the following:

6.      The impact of Covid-19 on wellbeing;

●       **Disruption to Sleep Patterns**  *“Please tell me how your sleep has changed during the pandemic?” , “Did you have problems sleeping before the pandemic and how do you assess the quality of your sleep now"*

●       **Difficulty With Concentration  “***Has your concentration changed during the pandemic? Please give examples of how this manifests itself?”*

●       **Concerns for One’s Own Health and the Health of Loved Ones** *“Have you experienced increased concern for your health and the health of your loved ones”*

●       **Increased Social Isolation**  *“what did you feel during the period of self-isolation and how did it affect your mental state?”*

●       **Changes in the Living Environment**  *“Could you tell me please how changed your living environment within the pandemic? ”, “how did it affect the usual way of life?”*

7.      The impact of Covid-19 on education:

**●**       **Increased Class Workload  *“Tell us how the academic load has changed during the pandemic? If it has increased, then how much? What problems were there at the moment?”***

**●**       **Concerns About Academic Performance *“Have you had any anxiety, fears or concerns about your academic performance”***

**●**       **Impact on Clinical Practice *“how has this situation affected your clinical practice? Could you get the necessary skills?”***

**8.**      **Coping Mechanism During COVID-19:**

●       **Seeking Support From Others** *“Did you need the support of others? Which of your loved ones gave you the greatest support during the period of self-isolation and the pandemic in general?” “what was it manifested in”*

●       **Seeking Professional Support During COVID-19 – and barriers to “***Have you used the professional support of psychologists or psychotherapists? What barriers were there at the moment?”*

9.      The impact of Covid-19 on professional identity formation:

●       **Awareness of social accountability** *Were you aware of social responsibility during the pandemic? What measures have you taken in this direction as a medical professional?*

●       **Awareness of global role of the doctor in addressing health inequities.** *Please tell us about the role of a doctor in the period of covid19? How important do you think this role was in solving the problem of health inequality?*

●       **Becoming a member of the wider healthcare community,** *“Did you consider yourself a member of the global medical community at that time?”*

●        **Appreciation of person-centred care** *“How important was patient orientation to you as a medical professional and as a patient or relative of a patient (if you were one)”*

●       **Awareness of personal needs and self-care** *“How has your awareness of personal needs and self-care changed after the pandemic”*

Appendix 2

**Informed Consent for Interview**

You are invited to participate in a research study entitled *“*A qualitative study of Nazarbayev University Medical students’ wellbeing during the COVID-19 pandemic*”.*

The purpose of this study is to find out how changed mental well-being of medical students of NU during pandemic (Covid19) . The interview will take approximately 45-50 minutes.

There are no potential risks involved in this study and you may refuse to participate at any time during the interview. Although participation does not involve direct benefits, your answers may provide valuable insights with regards to understanding and evaluating mental well-being of  medical students’ of NU during the pandemic and how it impacted to studying process including social and psychological factors.

No tangible compensation will be given. The research results will be available at the conclusion of the study.

Please note that any information obtained during this study will be kept confidential to the fullest extent possible. All efforts, within reason, will be made to keep personal information in the research records confidential. Any identifiers will be removed from the resulting interview data file and write-ups. The data file will be stored on a password protected computer.

Your participation in this study is completely voluntary. You may skip any questions that may cause discomfort, freely cease your participation at any moment, and not feel obligated to continue.

Are you interested in participating in this survey?

**YES**    [  ]

**NO**  [  ]

Contact Information:

Faye Foster

Advisor

[Should be contacted in English]

5/1, Kerei, Zhanibek Khandar str.

Email: faye.foster@nu.edu.kz

 Nabiy Arystan

Master student (2nd year)

Email: nabiy.arystan@nu.edu.kz
